# Supplementary material
Source: PubMed Central journal article supplement (PMC549438)

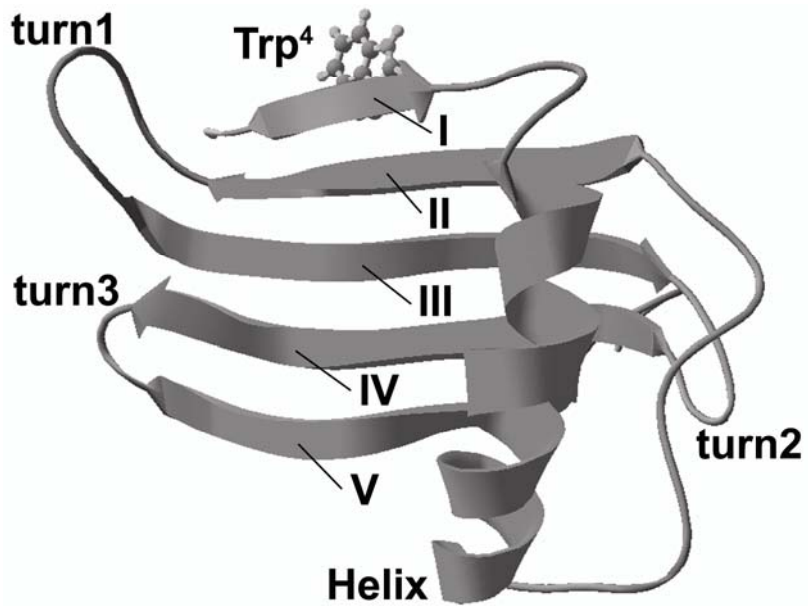

Supplement: pnas_102_8_2748__1.pdf [file pnas_102_8_2748__1.pdf]

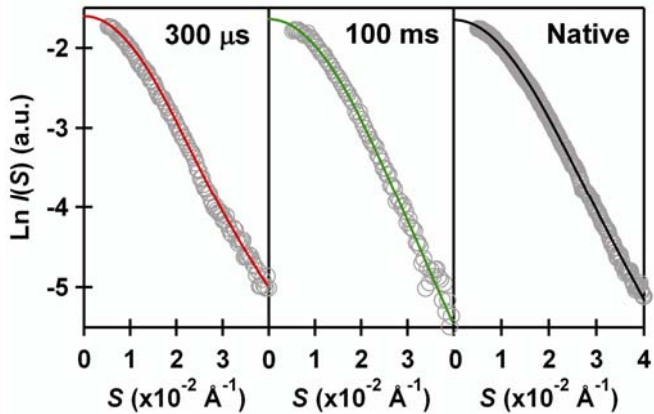

Supplement: pnas_102_8_2748__3.pdf [file pnas_102_8_2748__3.pdf]
